# Supplementary material
Source: Springer Nature journal article supplement (https://www.springermedizin.de/resource/supplementary/12879_2012_2513_MOESM6_ESM.pdf/9444750)

■ Oct 06-Sep 07 ■ Oct 07-Sep 08 ■ Oct 08-Sep 09 ■ Oct 09-Sep 10 ■ Oct 10-Sep 11

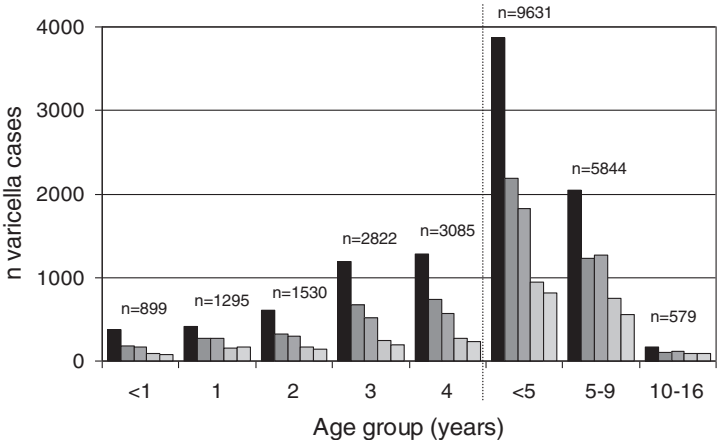

Supplement: MOESM6 [file 9444750]
